# Supplementary material
Source: publisher figshare collection journal article supplement (https://acs.figshare.com/ndownloader/files/5683131)
Supplement: Supplementary file 1 [file 5683131]

# CHEMISTRY OF MATERIALS

Chem. Mater., 1998, 10(12), 4015-4024, DOI: [10.1021/cm9804517](https://doi.org/10.1021/cm9804517)

## Terms & Conditions

Electronic Supporting Information files are available without a subscription to ACS Web Editions. The American Chemical Society holds a copyright ownership interest in any copyrightable Supporting Information. Files available from the ACS website may be downloaded for personal use only. Users are not otherwise permitted to reproduce, republish, redistribute, or sell any Supporting Information from the ACS website, either in whole or in part, in either machine-readable form or any other form without permission from the American Chemical Society. For permission to reproduce, republish and redistribute this material, requesters must process their own requests via the RightsLink permission system. Information about how to use the RightsLink permission system can be found at

<http://pubs.acs.org/page/copyright/permissions.html>

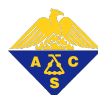

**ACS Publications**

MOST TRUSTED. MOST CITED. MOST READ.

Copyright © 1998 American Chemical Society

Supporting Information

Shantz and Lobo

Figure 1S. Static  $^2\text{H}$  NMR spectra of (a)  $d_9$ -SSZ-23 and (b)  $d_{12}$ -ZSM-12, and (c) neat  $d_{12}$ -4,4'-trimethylenebis(1,1'-dimethylpiperidinium) diiodide. One thousand scans were acquired for (a) and (c), and 10,000 scans were acquired for (b).

Figure 2S.  $^2\text{H}$  -  $\{^1\text{H}\}$  MAS spectra of (a)  $d_9$ -TMC6 - NON and (b)  $d_9$ -SSZ-23. 64 scans were acquired for both spectra.

Figure 3S. (a)  $^2\text{H}$  MAS spectra and (b,c)  $^2\text{H}$  -  $\{^1\text{H}\}$  CPMAS of  $d_9$ -TMC5 nonasil synthesized in  $\text{D}_2\text{O}$ . Contact times of 200  $\mu\text{s}$  and 400  $\mu\text{s}$  were used in (b) and (c) respectively.

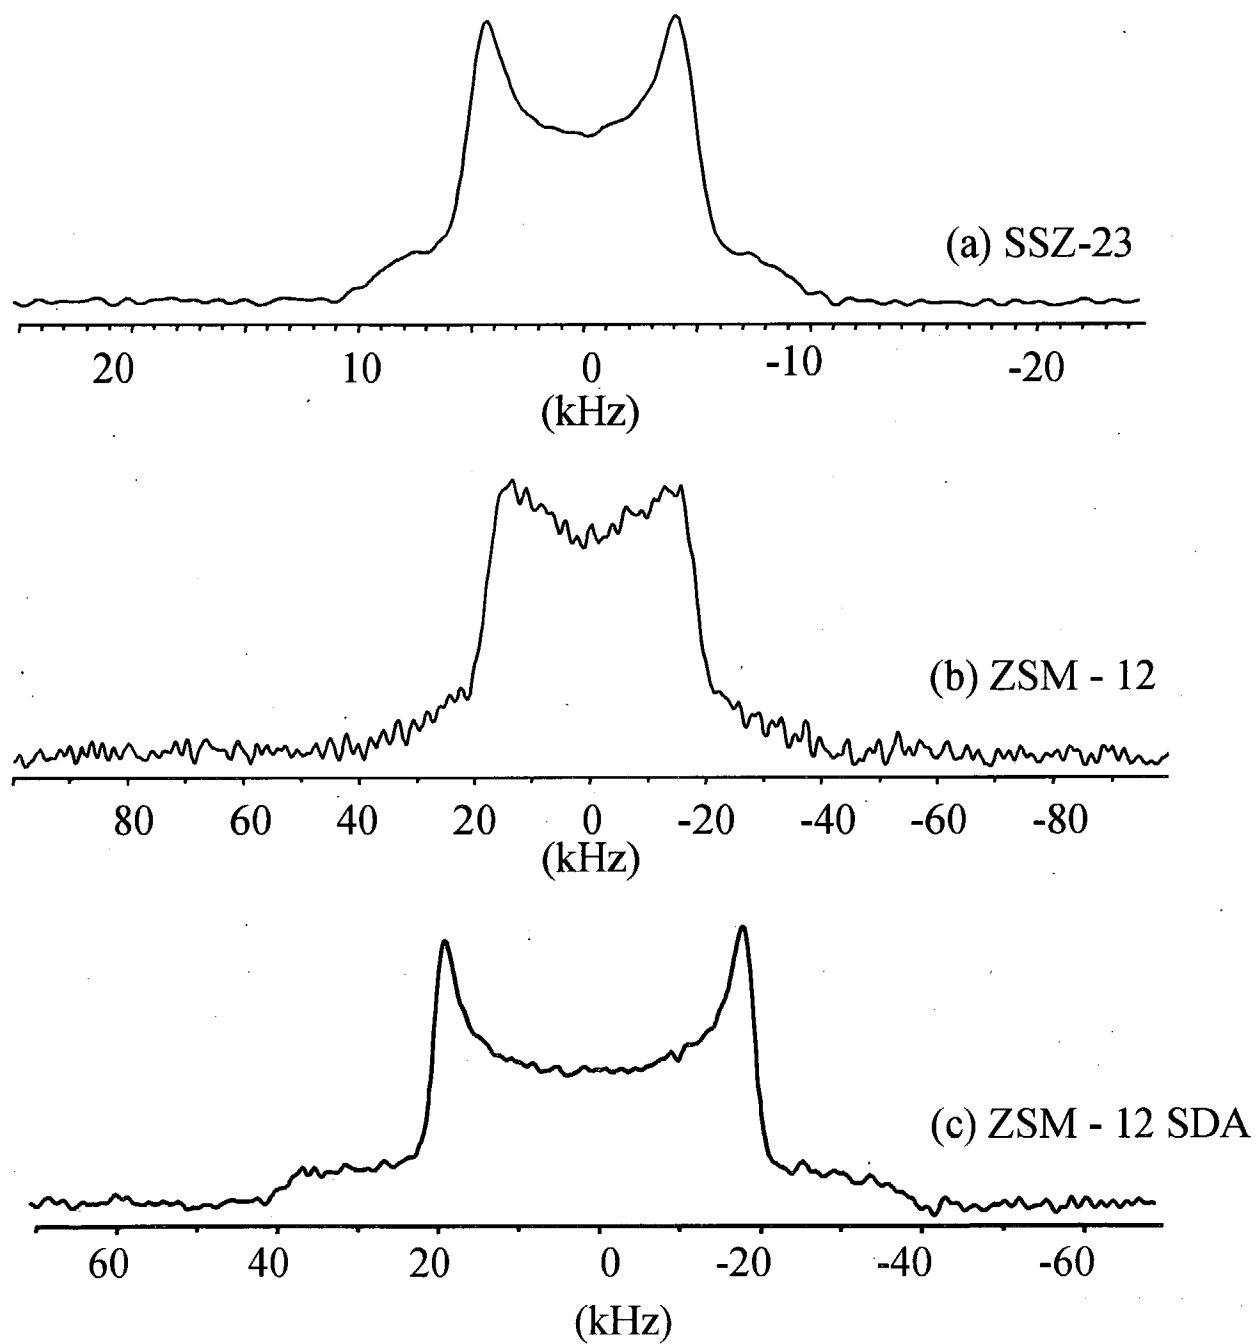

Figure 15

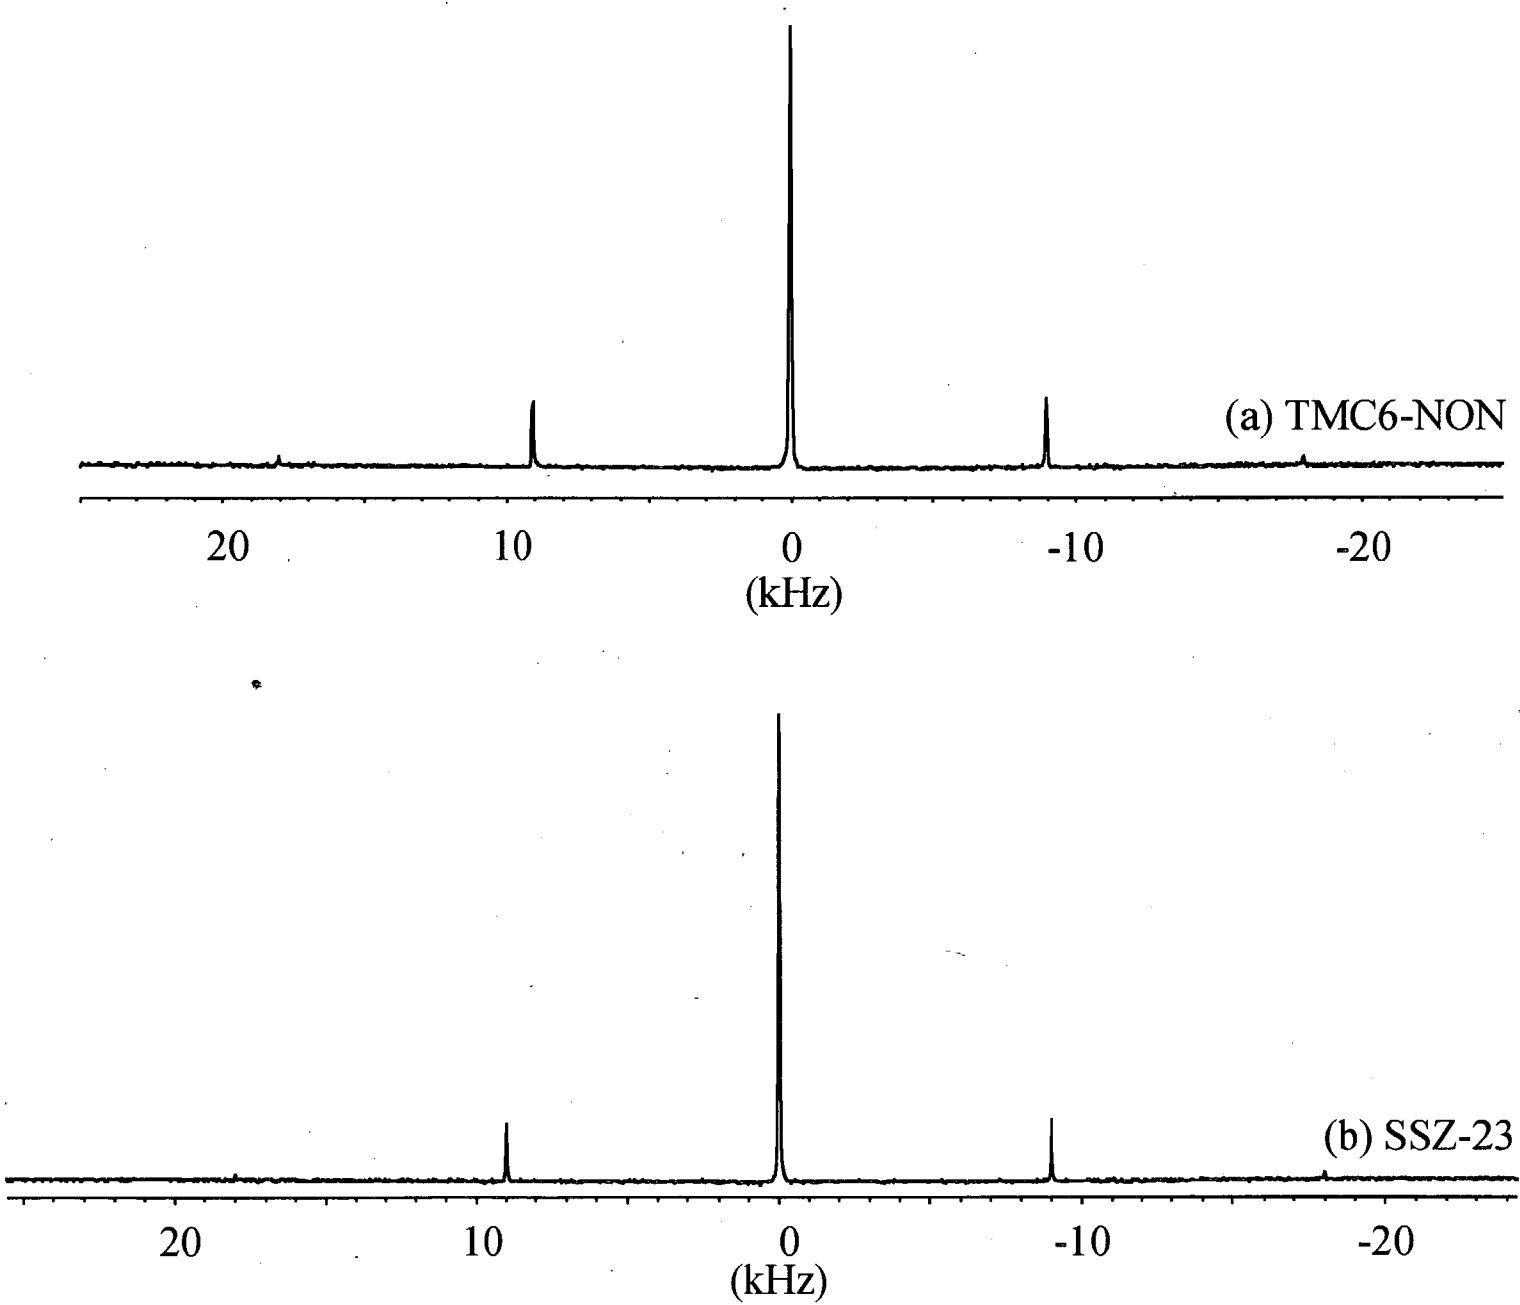

Figure 25

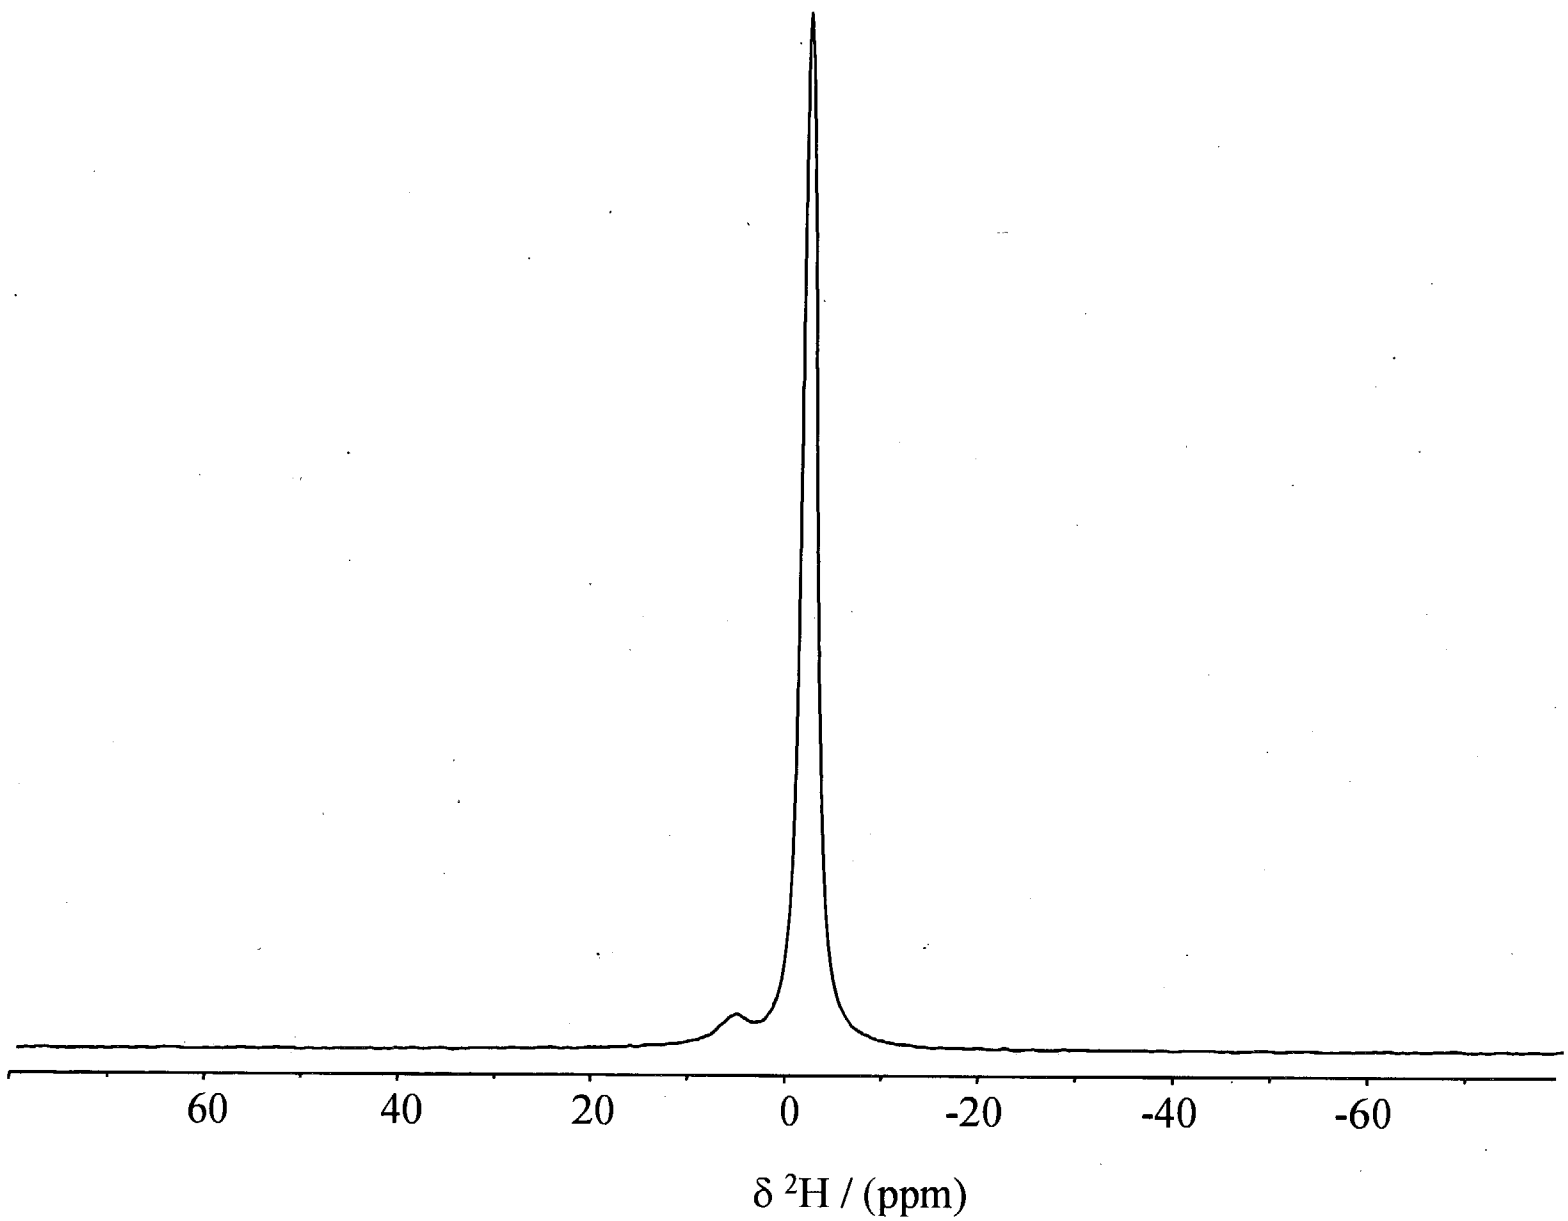

Figure S5 (a)

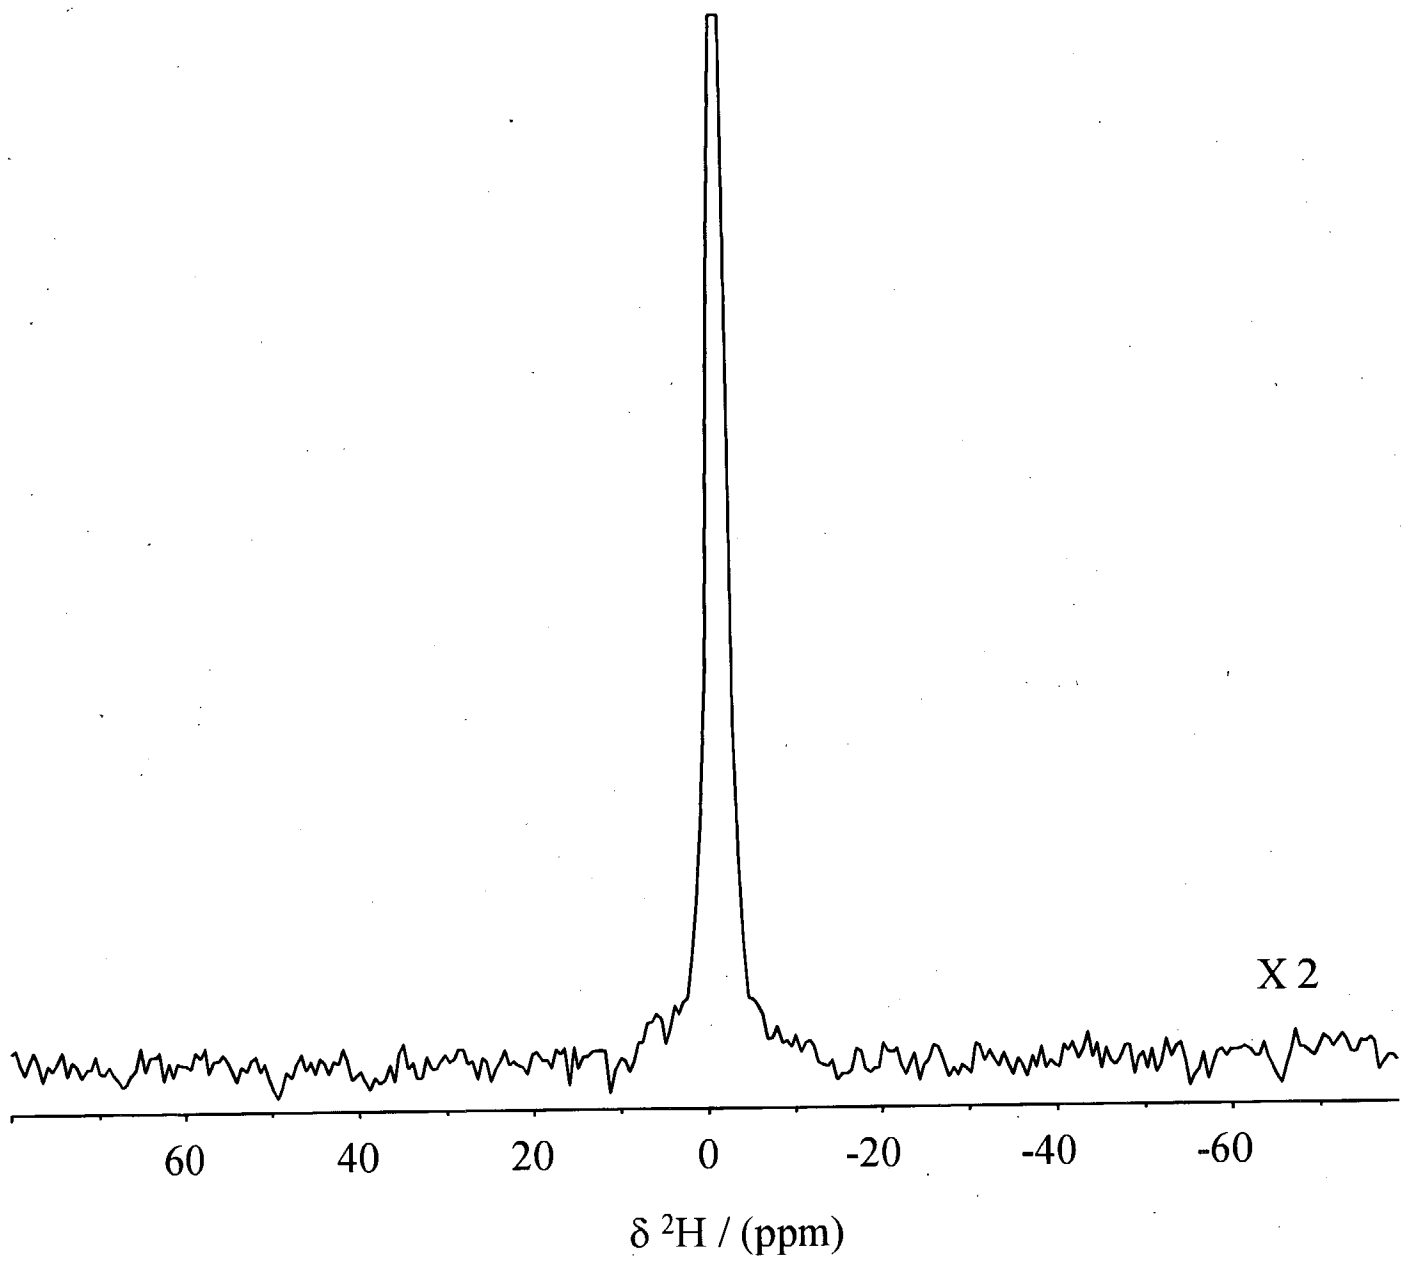

Figure S5 (b)

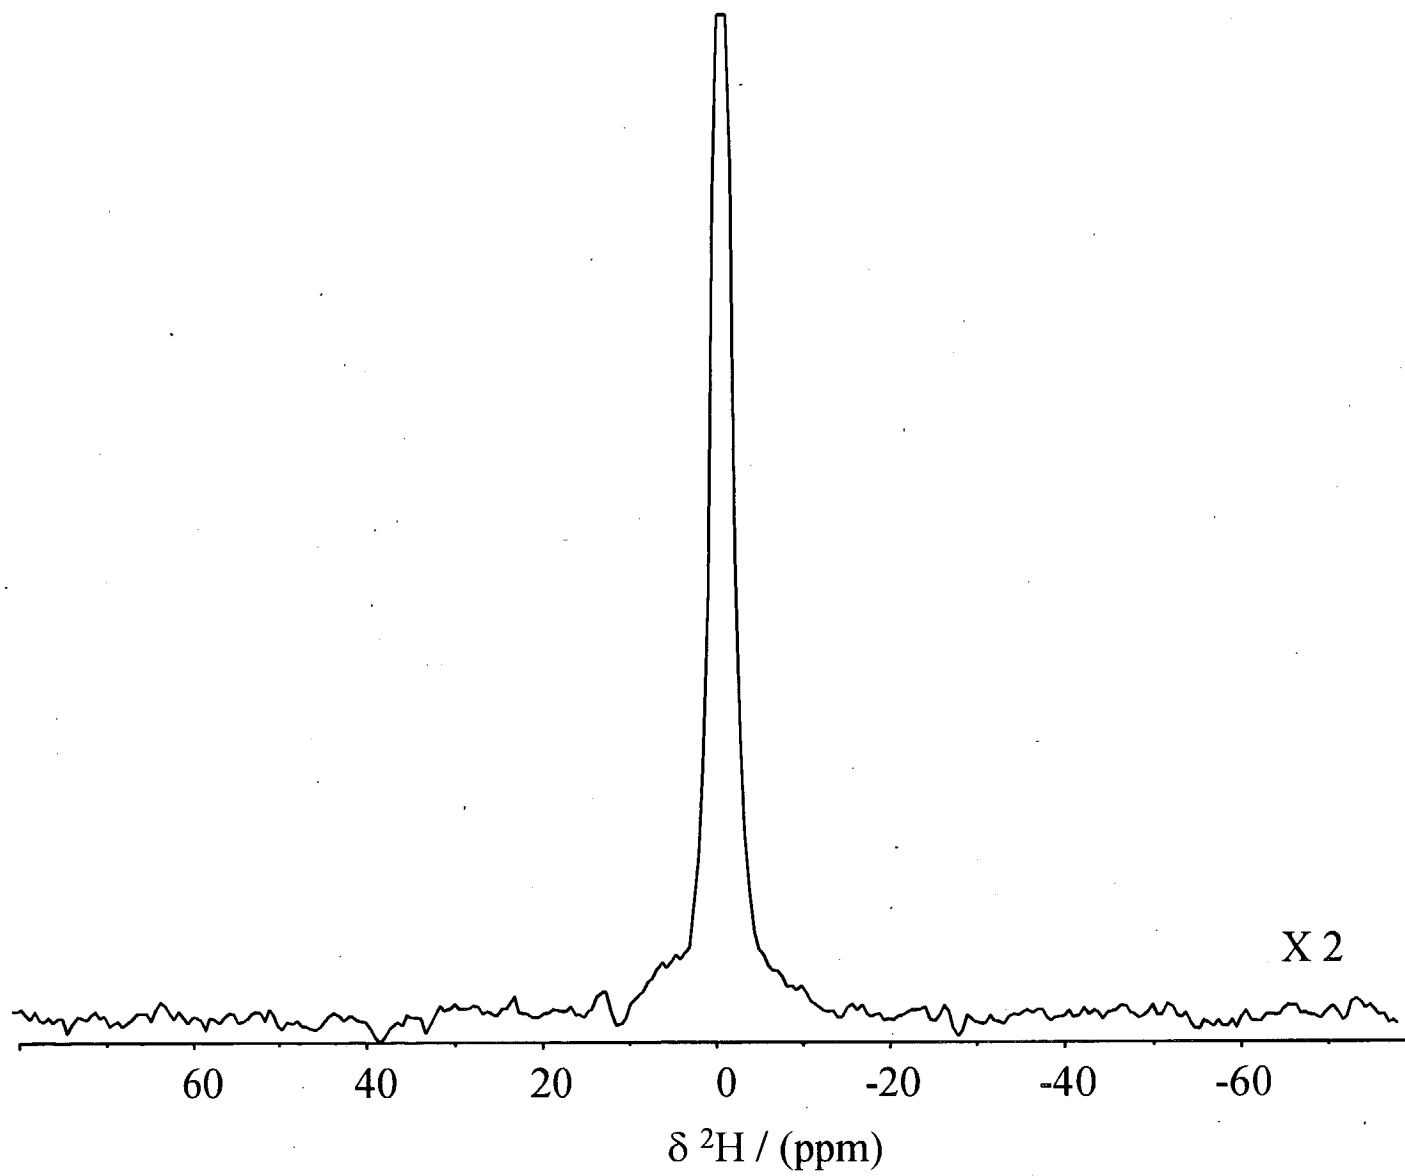

Figure S5 (c)
